# Supplementary material for: Phase I Clinical Trial Using [99mTc]Tc-1-thio-D-glucose for Diagnosis of Lymphoma Patients
Source: MDPI journal article supplement (doi:10.3390/pharmaceutics14061274), 2022-06-15
Supplement: s1 [file s1]

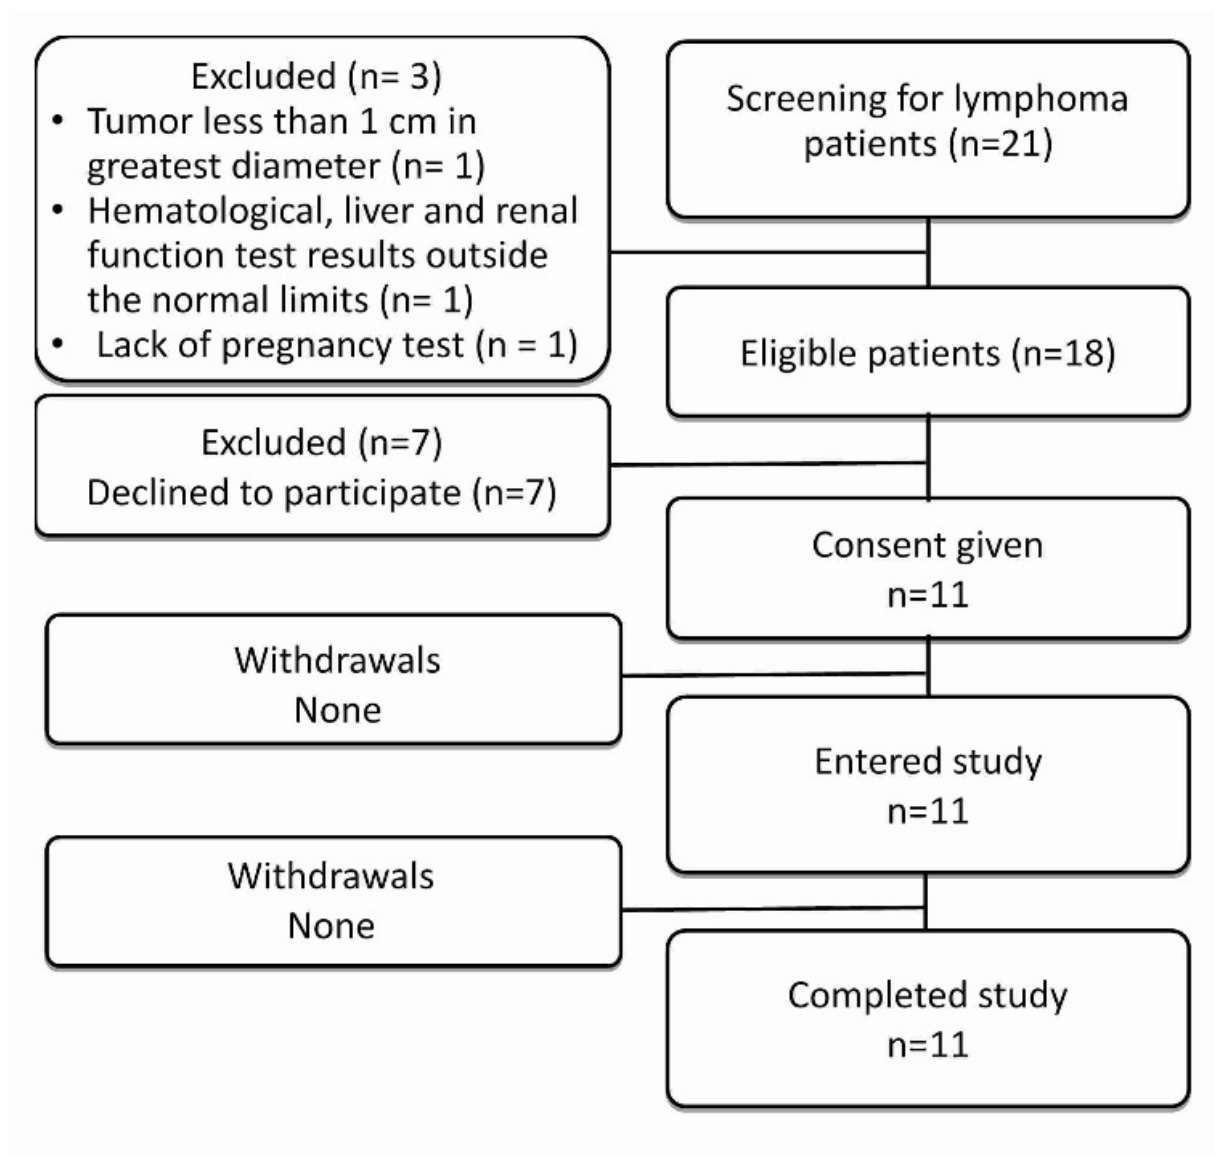

**Figure S1.** Standards for Reporting of Diagnostic Accuracy Studies (STARD) flow diagram.

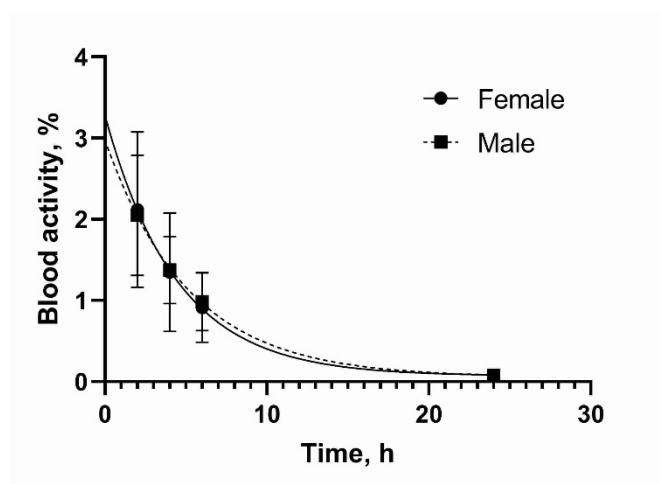

**Figure S2.** Kinetics of elimination of  $^{99m}\text{Tc}$ -TG from blood. Data are based on count rates in regions of interest placed over hearts. %ID = percentage injected dose.

**Table S1.** Parameters of blood biochemistry in patients before intravenous administration of a radiopharmaceutical and after 24, 48 hours and 7 days post administration.

| Blood index                     | Before intravenous administration<br>Me (Q1–Q3) | After a single intravenous administration |                                |                                |
|---------------------------------|-------------------------------------------------|-------------------------------------------|--------------------------------|--------------------------------|
|                                 |                                                 | 24 h<br>Me (Q1–Q3)                        | 48 h<br>Me (Q1–Q3)             | 7 days<br>Me (Q1–Q3)           |
| Alanine aminotransferase, U/L   | 13.0<br>(12–15)                                 | 14.0<br>(11–16)<br>p = 0.25               | 13.0<br>(12–15)<br>p = 0.26    | 13.0<br>(11–16)<br>p = 0.25    |
| Aspartate aminotransferase, U/L | 14.0<br>(12–16)                                 | 15.0<br>(12–17)<br>p = 0.31               | 14.0<br>(12–16)<br>p = 0.32    | 14.5<br>(13–16)<br>p = 0.29    |
| Alkaline phosphatase, U/L       | 162.0<br>(145–200)                              | 161.0<br>(143–200)<br>p = 0.21            | 162.5<br>(151–205)<br>p = 0.25 | 162.5<br>(151–206)<br>p = 0.24 |
| Glucose, mmol/L                 | 4.5<br>(4.2–5.6)                                | 4.45<br>(4.2–5.4)<br>p = 0.21             | 4.45<br>(4.1–5.4)<br>p = 0.22  | 4.5<br>(4.1–5.4)<br>p = 0.25   |
| Creatinine, $\mu$ mol/L         | 84.0<br>(66–89)                                 | 85.0<br>(68–92)<br>p = 0.24               | 84.0<br>(66–90)<br>p = 0.28    | 85.0<br>(68–93)<br>p = 0.31    |
| Protein, g/L                    | 74.0<br>(64–75)                                 | 73.5<br>(66–74)<br>p = 0.31               | 73.5<br>(65–75)<br>p = 0.24    | 74.5<br>(67–77)<br>p = 0.29    |
| Bilirubin, $\mu$ mol/L          | 9.7<br>(6.0–12.5)                               | 9.8<br>(6.5–12.6)<br>p = 0.22             | 9.9<br>(6.2–12.5)<br>p = 0.33  | 9.8<br>(5.6–12.9)<br>p = 0.36  |
